# Supplementary material
Source: PubMed Central journal article supplement (PMC6990622)
Supplement: ao9b03699_si_001.pdf [file ao9b03699_si_001.pdf]

# Supporting information

## Rendering redox reactions of cathodes in Li-ion capacitors enabled by lanthanides

Kaiqiang Zhang<sup>†,‡</sup>, Tae Hyung Lee<sup>†</sup>, Mohammad A. Khalilzadeh<sup>§</sup>, Rajender S. Varma<sup>\*,||</sup>, Ji-Won Choi<sup>\*,‡</sup>, Ho Won Jang<sup>\*,†</sup>, Mohammadreza Shokouhimehr<sup>\*,†</sup>

<sup>†</sup>Department of Materials Science and Engineering, Research Institute of Advanced Materials, Seoul National University, Seoul 08826, Republic of Korea

<sup>‡</sup>Electronic Materials Center, Korea Institute of Science and Technology (KIST), Seoul 136-791, Republic of Korea

<sup>§</sup>Department of Forest Biomaterials, College of Natural Resources, North Carolina State University, Raleigh, North Carolina 27607, United States

<sup>||</sup>Regional Center of Advanced Technologies and Materials, Department of Physical Chemistry, Faculty of Science, Palacky University, Šlechtitelů 27, 783 71 Olomouc, Czech Republic

\*Corresponding authors: varma.rajender@epa.gov (R.S.V.), jwchoi@kist.re.kr (J.-W. Choi), hwjang@snu.ac.kr (H. W. Jang), mrsh2@snu.ac.kr (M. Shokouhimehr)

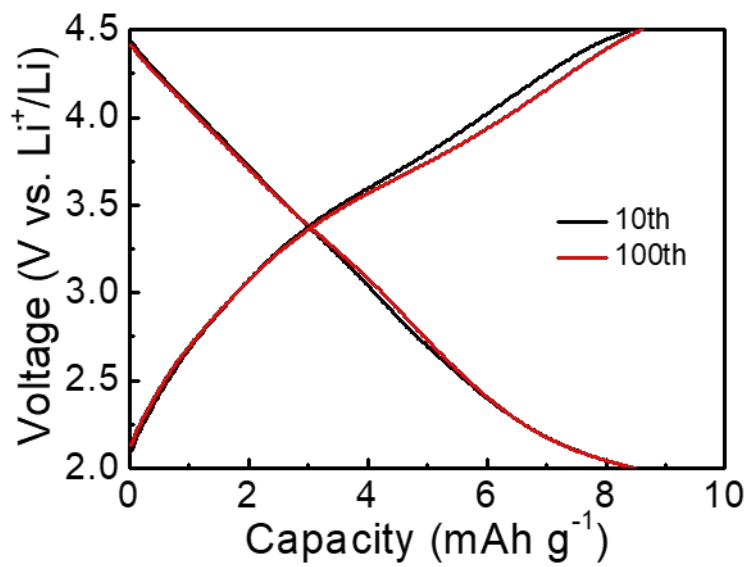

**Figure S1.** Voltage profiles during the repeated cycling measurement of bare MC demonstrating the capacitive Li-ion-storage process.

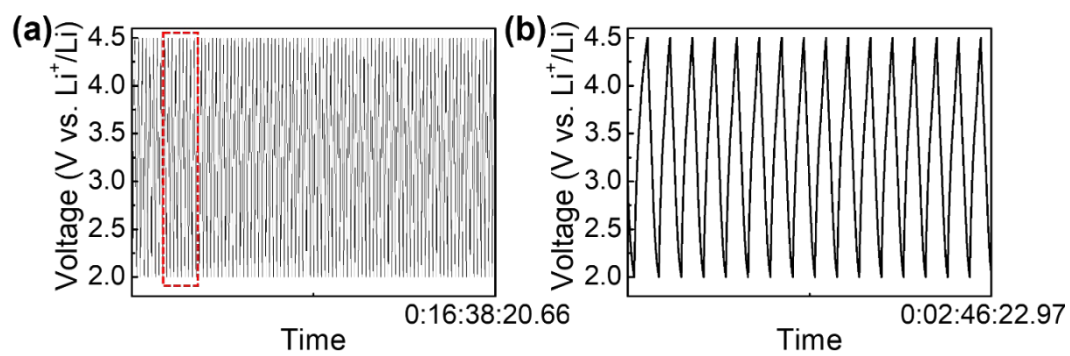

**Figure S2.** (a) Voltage profiles and (b) magnified part of the bare MC during the consecutive cycling measurement. It depicts a stable charge–discharge behavior.

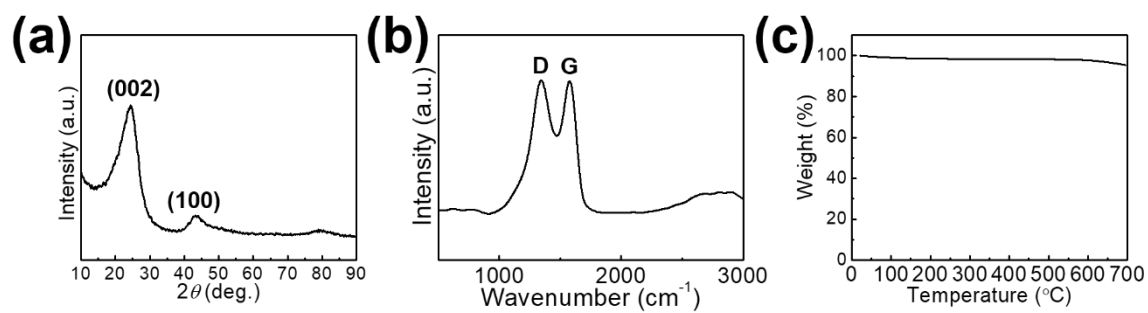

**Figure S3.** (a) XRD pattern, (b) Raman spectra, and (c) TGA curve of MC.

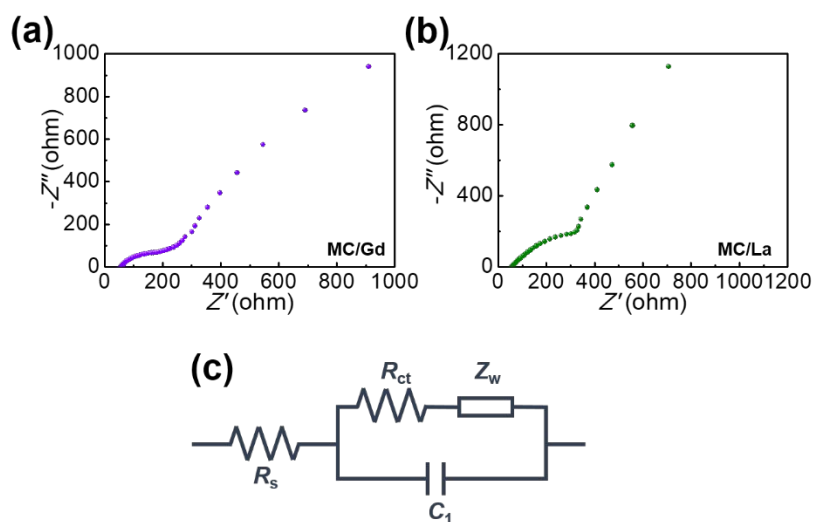

**Figure S4.** EIS curves of the (a) MC/Gd and (b) MC/La samples. (c) Equivalent circuit of the EIS curves with diverse components in the electrochemical system.

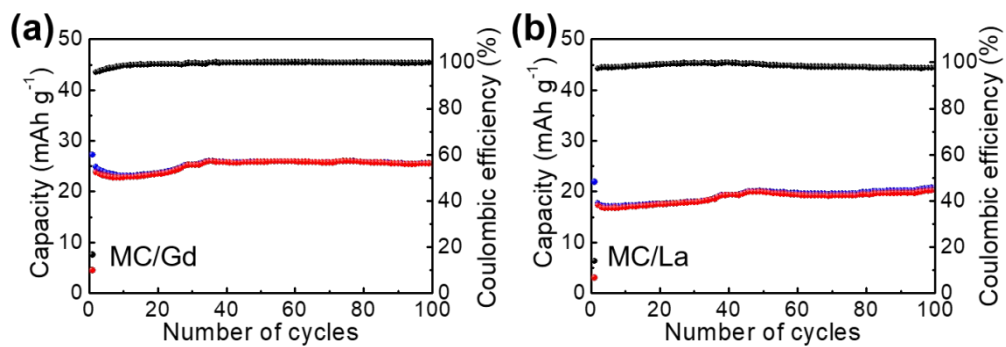

**Figure S5.** Repeated charge–discharge operations for (a) MC/Gd and (b) MC/La at a current density of 100 mA g<sup>-1</sup>.

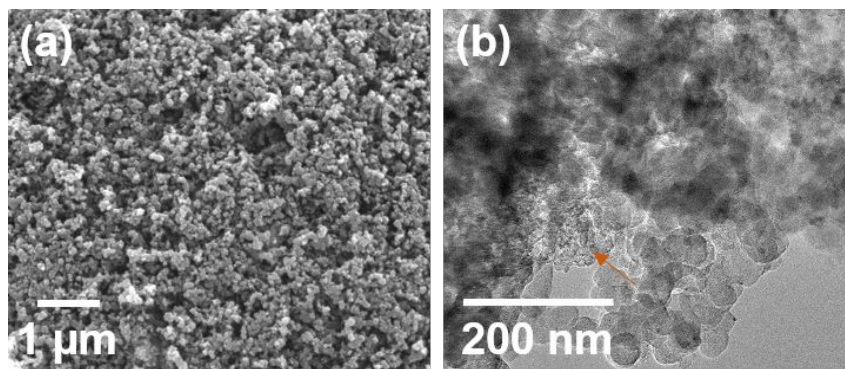

**Figure S6.** (a) SEM and (b) TEM images of the MC/Gd sample after long-term repeated charge–discharge measurements.

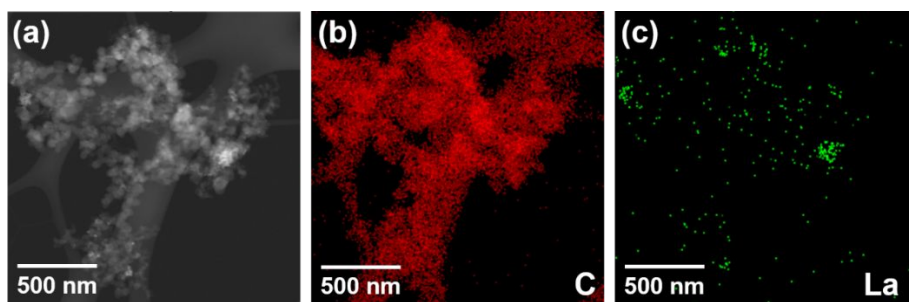

**Figure S7.** (a) STEM and (b,c) EDX mapping images of the MC/La sample after long-term repeated charge–discharge measurements.
